# Supplementary material for: Seroepidemiology of Lassa virus in pregnant women in Southern Nigeria: A prospective hospital-based cohort study
Source: PubMed Central journal article supplement (PMC10237645; doi:10.1371/journal.pntd.0011354), 2023-05-22
Supplement: pntd.0011354.s004.pdf [file pntd.0011354.s004.pdf]

## CASE RECORD FORM - SEROEPIDEMIOLOGY OF LASSA VIRUS IN PREGNANCY

### ENROLMENT QUESTIONNAIRE

| Study Code | Participant code |
|------------|------------------|
| LVP-OX     |                  |

| INCLUSION CRITERIA                                                                              | Yes | No |
|-------------------------------------------------------------------------------------------------|-----|----|
| Pregnant women attending antenatal clinic (ANC)                                                 |     |    |
| Pregnant women who are willing and able to give informed consent for participation in the study |     |    |
| Aged $\geq 15$ years                                                                            |     |    |
| EXCLUSION CRITERIA                                                                              | Yes | No |
| Legally authorised representative (LAR) is absent or unavailable                                |     |    |
| Patients for end of life care                                                                   |     |    |
| Participant withdraws consent                                                                   |     |    |

If the eligibility criteria have been confirmed, the individual can be enrolled in the study

# ENROLMENT QUESTIONNAIRE

## ENROLMENT VISIT DATES

|                                                 |                                                                                                                                                   |
|-------------------------------------------------|---------------------------------------------------------------------------------------------------------------------------------------------------|
| Date of inclusion or enrolment                  | ___/___/___                                                                                                                                       |
| Date of interview                               | ___/___/___                                                                                                                                       |
| Name of site/clinic hospital                    | <input type="checkbox"/> Irrua Specialist Teaching Hospital (ISTH)<br><input type="checkbox"/> Esan West<br><input type="checkbox"/> Esan Central |
| Full Name of staff completing the questionnaire |                                                                                                                                                   |
| Signature of staff completing the questionnaire |                                                                                                                                                   |

## ENROLMENT MEDICAL DATA

### Demographic Data

|                                                                                                                                                                                      |                                                                                                                                                                                                                 |
|--------------------------------------------------------------------------------------------------------------------------------------------------------------------------------------|-----------------------------------------------------------------------------------------------------------------------------------------------------------------------------------------------------------------|
| <b>1. Date of birth (DD/MM/YYYY)</b><br><br><i>If the patient doesn't know her date of birth then record this as 15/06/YYYY. The year of birth can be extrapolated from the age.</i> | ___/___/___                                                                                                                                                                                                     |
| <b>2. Age</b>                                                                                                                                                                        | [__   __ ] years                                                                                                                                                                                                |
| <b>3. Date of last normal menstrual period</b>                                                                                                                                       | ___/___/___ <input type="checkbox"/> Certain<br><input type="checkbox"/> Uncertain <input type="checkbox"/> Unknown                                                                                             |
| <b>4. Current gestational age based on LNMP</b>                                                                                                                                      | [__   __ ] Weeks                                                                                                                                                                                                |
| <b>5. Gestational age from fundal height</b>                                                                                                                                         | [__   __ ] Weeks                                                                                                                                                                                                |
| <b>6. Estimated date of delivery</b>                                                                                                                                                 | ___/___/___                                                                                                                                                                                                     |
| <b>7. Residence</b>                                                                                                                                                                  | <input type="checkbox"/> Urban<br><input type="checkbox"/> Rural                                                                                                                                                |
| <b>8. Area of residence in last 6 months (district name)</b>                                                                                                                         |                                                                                                                                                                                                                 |
| <b>9. Religion</b>                                                                                                                                                                   | <input type="checkbox"/> None<br><input type="checkbox"/> Christian<br><input type="checkbox"/> Muslim<br><input type="checkbox"/> Traditional religions<br><input type="checkbox"/> if Other religion specify: |
| <b>10. Educational level</b>                                                                                                                                                         | <input type="checkbox"/> No formal education<br><input type="checkbox"/> Formal education- primary<br><input type="checkbox"/> Formal education – secondary                                                     |

## ENROLMENT QUESTIONNAIRE

|                                                                                                                                    |                                                                                                                                                                                                                                                                                                                                                                                                                                                                                                       |
|------------------------------------------------------------------------------------------------------------------------------------|-------------------------------------------------------------------------------------------------------------------------------------------------------------------------------------------------------------------------------------------------------------------------------------------------------------------------------------------------------------------------------------------------------------------------------------------------------------------------------------------------------|
|                                                                                                                                    | <input type="checkbox"/> Formal education – tertiary                                                                                                                                                                                                                                                                                                                                                                                                                                                  |
| <b>11. Occupation</b>                                                                                                              | <input type="checkbox"/> None (no profession)<br><input type="checkbox"/> Housewife<br><input type="checkbox"/> Healthcare Occupations ( <i>nurse, ward assistants, doctors etc</i> )<br><input type="checkbox"/> Farming and Forestry Occupations<br><input type="checkbox"/> Education ( <i>student/teacher at any level</i> )<br><input type="checkbox"/> Office and Administrative Occupations ( <i>banking, legal, management, public office etc</i> )<br><input type="checkbox"/> Other specify |
| <b>12. Knowledge of Lassa Fever risk factors</b>                                                                                   | <input type="checkbox"/> No knowledge<br><input type="checkbox"/> 1 or 2 risk factors<br><input type="checkbox"/> 3 or more risk factors (good)                                                                                                                                                                                                                                                                                                                                                       |
| <b>13. Knowledge of Lassa Fever transmission</b>                                                                                   | <input type="checkbox"/> No knowledge<br><input type="checkbox"/> 1 or 2 routes<br><input type="checkbox"/> 3 or more routes (good)                                                                                                                                                                                                                                                                                                                                                                   |
| <b>In the last 6 months has she</b>                                                                                                |                                                                                                                                                                                                                                                                                                                                                                                                                                                                                                       |
| <b>14. Been exposed to rodents</b><br><br><i>(e.g. eating, or rats seen at home, rat burrows in house or killing rats at home)</i> | <input type="checkbox"/> Yes<br><input type="checkbox"/> No                                                                                                                                                                                                                                                                                                                                                                                                                                           |
| <b>15. Cared for someone who was bleeding due to unknown causes</b>                                                                | <input type="checkbox"/> Yes<br><input type="checkbox"/> No                                                                                                                                                                                                                                                                                                                                                                                                                                           |
| <b>16. Participated in funeral rites (washing of the body/clothes of deceased)</b>                                                 | <input type="checkbox"/> Yes<br><input type="checkbox"/> No                                                                                                                                                                                                                                                                                                                                                                                                                                           |
| <b>17. Cared for someone who was diagnosed with Lassa fever</b>                                                                    | <input type="checkbox"/> Yes<br><input type="checkbox"/> No                                                                                                                                                                                                                                                                                                                                                                                                                                           |
| <b>18. Cared for someone who died of unknown causes</b>                                                                            | <input type="checkbox"/> Yes<br><input type="checkbox"/> No                                                                                                                                                                                                                                                                                                                                                                                                                                           |

### Medical and Obstetric History (*verify with ANC and/or hospital notes*)

|                                                                          |           |
|--------------------------------------------------------------------------|-----------|
| <b>19. Number of previous pregnancies (excluding present pregnancy):</b> | [ _   _ ] |
| <b>20. Number of previous births after 22 weeks' gestation:</b>          | [ _   _ ] |
| <b>21. Number of livebirths</b>                                          | [ _   _ ] |

## ENROLMENT QUESTIONNAIRE

|                                                                                                                                |                                                                                                                                                          |
|--------------------------------------------------------------------------------------------------------------------------------|----------------------------------------------------------------------------------------------------------------------------------------------------------|
| 22. Have any previous babies been premature (<37weeks of gestation)?                                                           | <input type="checkbox"/> Yes<br><input type="checkbox"/> No<br><input type="checkbox"/> Unknown                                                          |
| 23. Have any previous babies weighed less than 2.5kg?                                                                          | <input type="checkbox"/> Yes<br><input type="checkbox"/> No<br><input type="checkbox"/> Unknown                                                          |
| 24. Has she been treated for Lassa fever in the past?                                                                          | <input type="checkbox"/> Yes<br><input type="checkbox"/> No<br><input type="checkbox"/> Unknown                                                          |
| 25. Has she been diagnosed with Lassa fever during this pregnancy?                                                             | <input type="checkbox"/> Yes<br><input type="checkbox"/> No<br><input type="checkbox"/> Unknown                                                          |
| 26. Has she had any fevers in the last 2 weeks?                                                                                | <input type="checkbox"/> Yes<br><input type="checkbox"/> No<br><input type="checkbox"/> Unknown                                                          |
| 27. Has she been diagnosed with any of the following chronic medical conditions <b>before</b> pregnancy? (tick all that apply) | <input type="checkbox"/> Hypertension<br><input type="checkbox"/> Diabetes<br><input type="checkbox"/> Other<br>If other medical complications specify?  |
| 28. Has she been diagnosed with gestational diabetes in this pregnancy?                                                        | <input type="checkbox"/> Yes<br><input type="checkbox"/> No<br><input type="checkbox"/> Unknown                                                          |
| 29. Has she been diagnosed with pregnancy –induced hypertension (PIH) in this pregnancy?                                       | <input type="checkbox"/> Yes<br><input type="checkbox"/> No<br><input type="checkbox"/> Unknown                                                          |
| 30. Has she been diagnosed with pre-eclampsia in this pregnancy?                                                               | <input type="checkbox"/> Yes<br><input type="checkbox"/> No<br><input type="checkbox"/> Unknown                                                          |
| 31. Has she been diagnosed with eclampsia in this pregnancy?                                                                   | <input type="checkbox"/> Yes<br><input type="checkbox"/> No<br><input type="checkbox"/> Unknown                                                          |
| 32. Are there any other pregnancy-related complications                                                                        | <input type="checkbox"/> Yes<br><input type="checkbox"/> No<br><input type="checkbox"/> Unknown<br>If yes specify other pregnancy related complications: |
| 33. Has she been diagnosed with HIV?                                                                                           | <input type="checkbox"/> Yes                                                                                                                             |

## ENROLMENT QUESTIONNAIRE

|                                                                                                                                                            |                                                                                                                                                    |
|------------------------------------------------------------------------------------------------------------------------------------------------------------|----------------------------------------------------------------------------------------------------------------------------------------------------|
|                                                                                                                                                            | <input type="checkbox"/> No<br><input type="checkbox"/> Unknown<br><input type="checkbox"/> Not answered                                           |
| <b>34.</b> Has she had Malaria during the current pregnancy?                                                                                               | <input type="checkbox"/> Yes<br><input type="checkbox"/> No<br><input type="checkbox"/> Unknown                                                    |
| <b>35.</b> Has she been vaccinated for tetanus?                                                                                                            | <input type="checkbox"/> Yes<br><input type="checkbox"/> No<br><input type="checkbox"/> Unknown                                                    |
| <b>36.</b> If yes to question 26 above, number of tetanus (TT) vaccines received?                                                                          | <input type="checkbox"/> 1<br><input type="checkbox"/> 2<br><input type="checkbox"/> 3<br><input type="checkbox"/> 4<br><input type="checkbox"/> 5 |
| <b>37.</b> Please list all medication she is currently using?<br><br><hr style="width: 20px; margin-left: 0;"/> <i>(use generic names NOT brand names)</i> |                                                                                                                                                    |
| <b>38.</b> On what date was the 1 <sup>st</sup> (enrolment) blood sample collected from mother?<br><i>(DD/MM/YYYY e.g. 01/02/2019)</i>                     | ___/___/_____                                                                                                                                      |
| <b>39.</b> At what time was the 1 <sup>st</sup> (enrolment) blood sample was collected from mother?<br><i>(time in 24hour e.g 13:05 or 08:05)</i>          | [ _   _ : _   _ ]                                                                                                                                  |

**Ultrasound Results (do not use old ultrasound results unless they are ≤ 1 week old)**

|                                           |                                                                                                                                                                                                                          |
|-------------------------------------------|--------------------------------------------------------------------------------------------------------------------------------------------------------------------------------------------------------------------------|
| <b>40.</b> Was ultrasound performed?      | <input type="checkbox"/> Yes<br><input type="checkbox"/> No                                                                                                                                                              |
| <b>41.</b> If no why was it not performed | <input type="checkbox"/> Patient refused<br><input type="checkbox"/> Patient not cooperative<br><input type="checkbox"/> Ultrasound machine not functional<br><input type="checkbox"/> Other<br>If other reason specify: |
| <b>42.</b> Ultrasound date                |                                                                                                                                                                                                                          |

## ENROLMENT QUESTIONNAIRE

|                                                         |                                                                                                                    |
|---------------------------------------------------------|--------------------------------------------------------------------------------------------------------------------|
|                                                         | _ / _ / _                                                                                                          |
| <b>43.</b> Gestational age by ultrasound                | [ _   _ ]<br>Weeks                                                                                                 |
| <b>44.</b> Fetal growth restriction                     | <input type="checkbox"/> Yes<br><input type="checkbox"/> No<br><input type="checkbox"/> Unknown                    |
| <b>45.</b> Any other significant findings on Ultrasound | <input type="checkbox"/> Yes<br><input type="checkbox"/> No<br><input type="checkbox"/> Unknown<br>If yes specify: |

**Has a BLOOD SAMPLE been collected for this patient?**

**Cross-check that all questions have been answered.**

**Give the patient a yellow card, explain she should call the number on the card when in labour.**
